# Supplementary material for: Comparative phyloproteomics identifies conserved plasmodesmal proteins
Source: PubMed Central journal article supplement (PMC10049917; doi:10.1093/jxb/erad022), 2023-01-14
Supplement: erad022_suppl_supplementary_table_s7.pdf [file erad022_suppl_supplementary_table_s7.pdf]

**Table S7:** List of orthogroups identified in at least four of five proteomes when the stringency for protein identification in AtL and PpPG is reduced.

| Orthogroup | Protein Class                                      | # Proteomes | # Proteins | In Table 1 |
|------------|----------------------------------------------------|-------------|------------|------------|
| OG0        | Kinase                                             | 5           | 50         | No         |
| OG1        | Peroxidase                                         | 4           | 20         | Yes        |
| OG2        | C2 lipid-binding (MCTP)                            | 4           | 20         | Yes        |
| OG3        | Callose synthase                                   | 4           | 15         | No         |
| OG4        | $\beta$ -1,3-glucanase                             | 5           | 14         | Yes        |
| OG5        | Tubulin beta-7                                     | 4           | 13         | Yes        |
| OG6        | SKU5                                               | 4           | 13         | Yes        |
| OG8        | Leucine-rich repeat extensin-like                  | 4           | 12         | Yes        |
| O10        | Glycine-rich RNA-binding                           | 4           | 11         | Yes        |
| OG11       | Aspartyl protease                                  | 4           | 10         | Yes        |
| OG14       | RLK                                                | 4           | 10         | No         |
| OG15       | ATP-binding cassette                               | 5           | 10         | Yes        |
| OG16       | Transmembrane protein                              | 5           | 10         | Yes        |
| OG17       | Histone 2B                                         | 4           | 9          | Yes        |
| OG20       | NDR1/HIN1-like protein                             | 5           | 9          | No         |
| OG21       | Heavy metal associated isoprenylated plant protein | 4           | 9          | No         |
| OG24       | DUF26 containing protein                           | 4           | 8          | Yes        |
| OG30       | Eukaryotic initiation factor 4A                    | 4           | 7          | Yes        |
| OG32       | CSC1-like protein ERD4 (OSCA)                      | 5           | 7          | No         |
| OG35       | Xyloglucan endotransglucosylase/ hydrolase         | 4           | 7          | No         |
| OG40       | Subtilisin-like protease                           | 4           | 6          | Yes        |
| OG44       | Serine carboxypeptidase-like                       | 4           | 6          | No         |
| OG68       | Prohibitin                                         | 4           | 5          | No         |
| OG81       | Tetraspanin                                        | 4           | 5          | Yes        |
| OG88       | DUF1191 transmembrane protein                      | 4           | 4          | No         |
| OG102      | Ribosomal protein                                  | 4           | 4          | Yes        |
| OG103      | Molybdopterin biosynthesis                         | 4           | 4          | No         |
